# Supplementary material for: Tpeak‐Tend, Tpeak‐Tend/QT ratio and Tpeak‐Tend dispersion for risk stratification in Brugada Syndrome: A systematic review and meta‐analysis
Source: PubMed Central journal article supplement — J Arrhythm. 2018 Sep 10;34(6):587–97. doi: 10.1002/joa3.12118 (PMC6288557; doi:10.1002/joa3.12118), 2018-09-10
Supplement: JOA3-34-587-s001.pdf [file JOA3-34-587-s001.pdf]

## Supplementary Materials

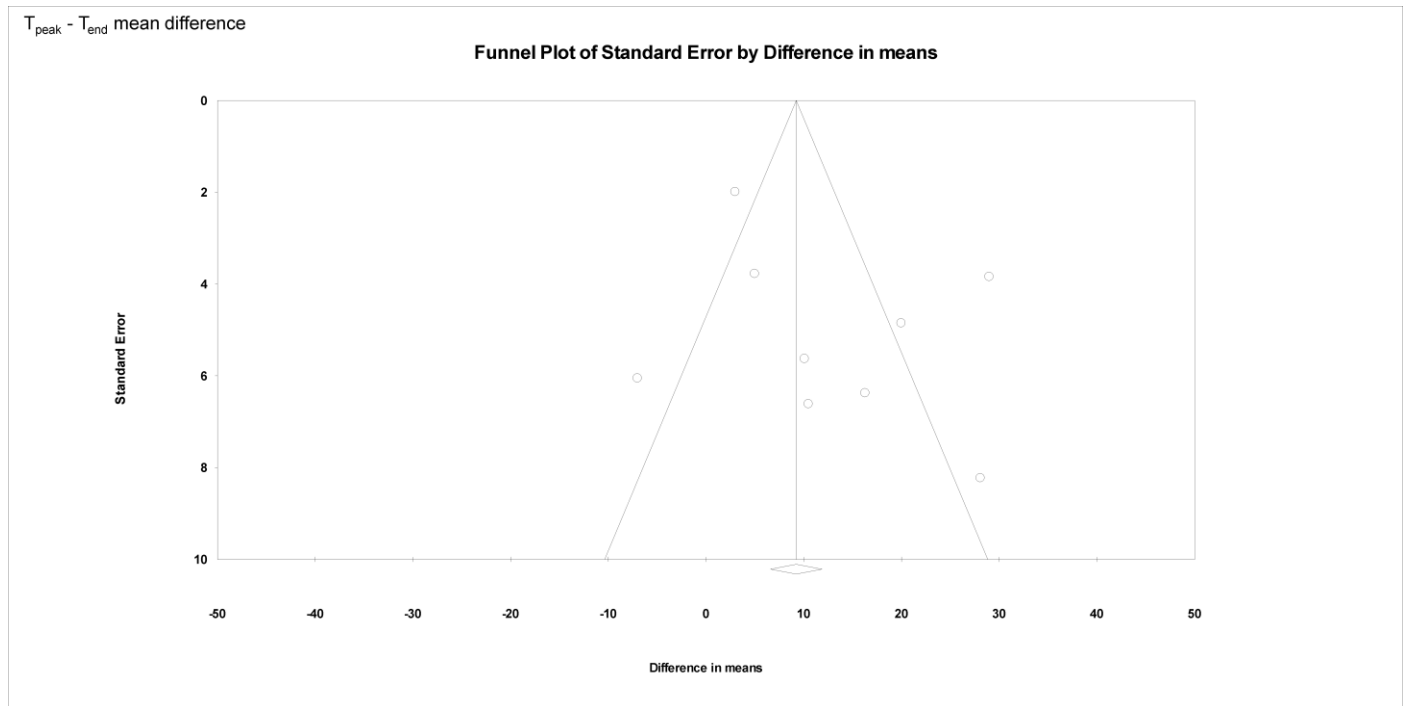

**Supplementary Figure 1.** Funnel plot of standard errors against differences in means for  $T_{\text{peak}} - T_{\text{end}}$  interval.

### Maximum $T_{\text{peak}} - T_{\text{end}}$ mean difference (sensitivity analysis)

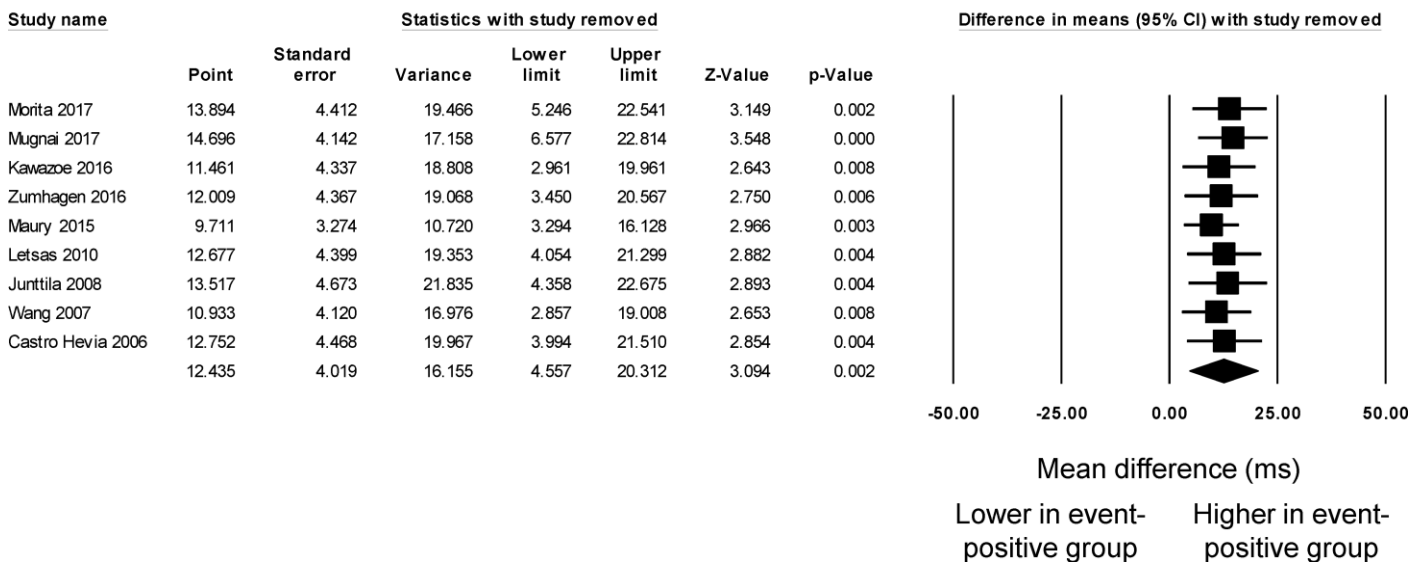

**Supplementary Figure 2.** Forest plot demonstrating the results of sensitivity analysis by removing one study at a time for mean differences for  $T_{\text{peak}} - T_{\text{end}}$  interval.

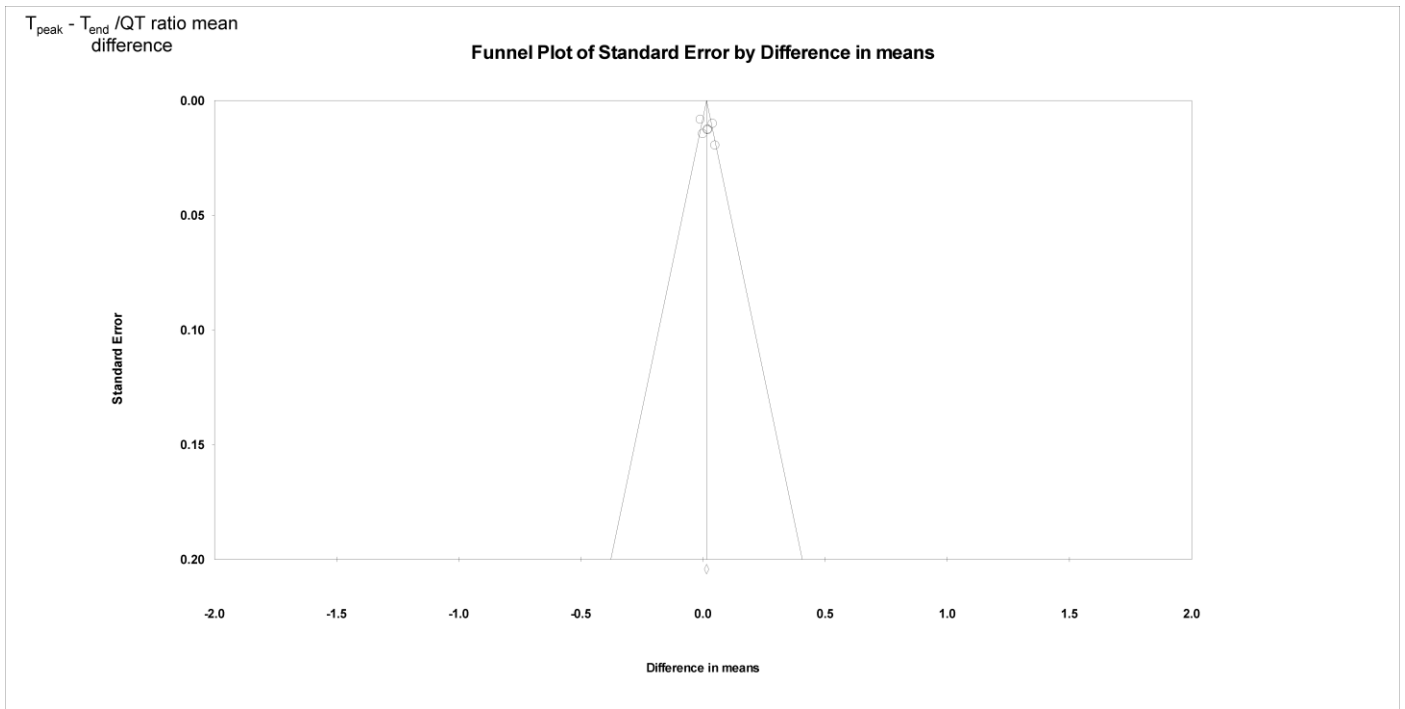

**Supplementary Figure 3.** Funnel plot of standard errors against differences in means for  $T_{\text{peak}} - T_{\text{end}} / QT$  ratio.

Maximum  $T_{\text{peak}} - T_{\text{end}} / QT$  ratio (sensitivity analysis)

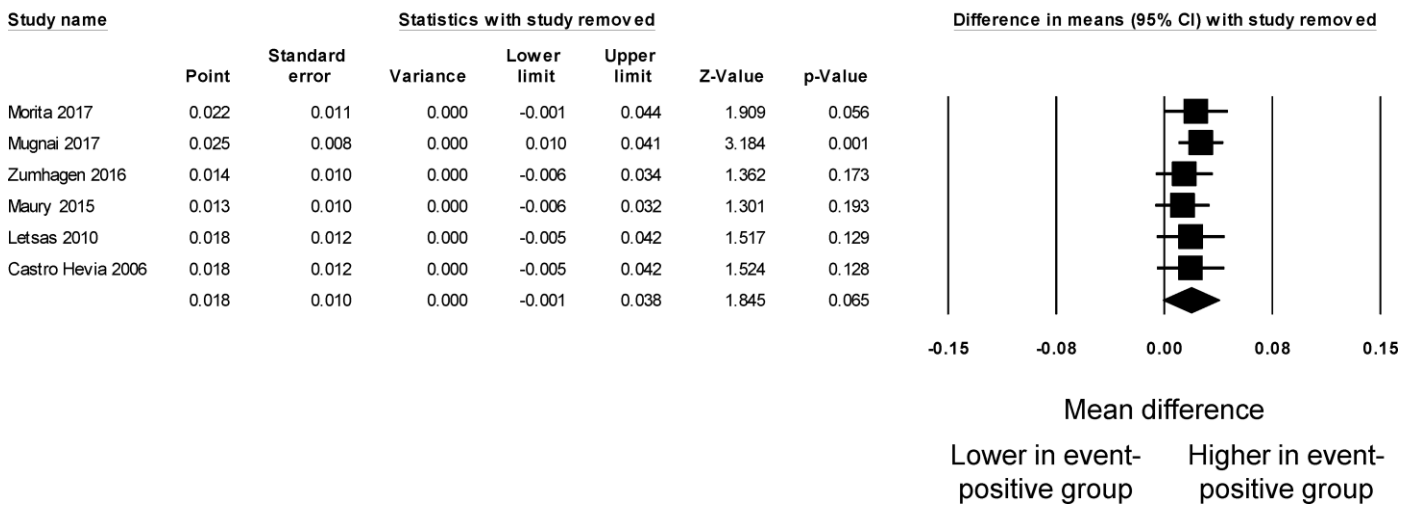

**Supplementary Figure 4.** Forest plot demonstrating the results of sensitivity analysis by removing one study at a time for mean differences for  $T_{\text{peak}} - T_{\text{end}} / QT$  ratio.

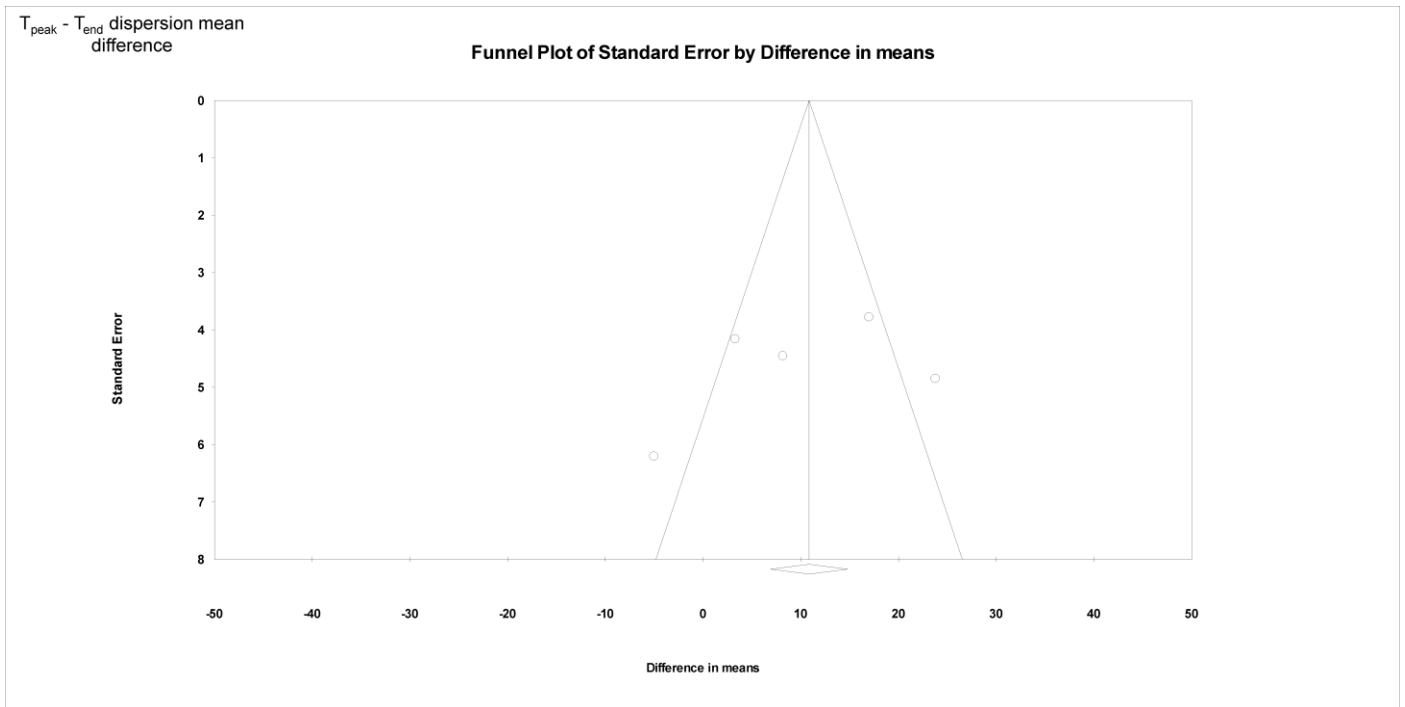

**Supplementary Figure 5.** Funnel plot of standard errors against differences in means for  $T_{\text{peak}} - T_{\text{end}}$  dispersion.

**Maximum  $T_{\text{peak}} - T_{\text{end}}$  dispersion (sensitivity analysis)**

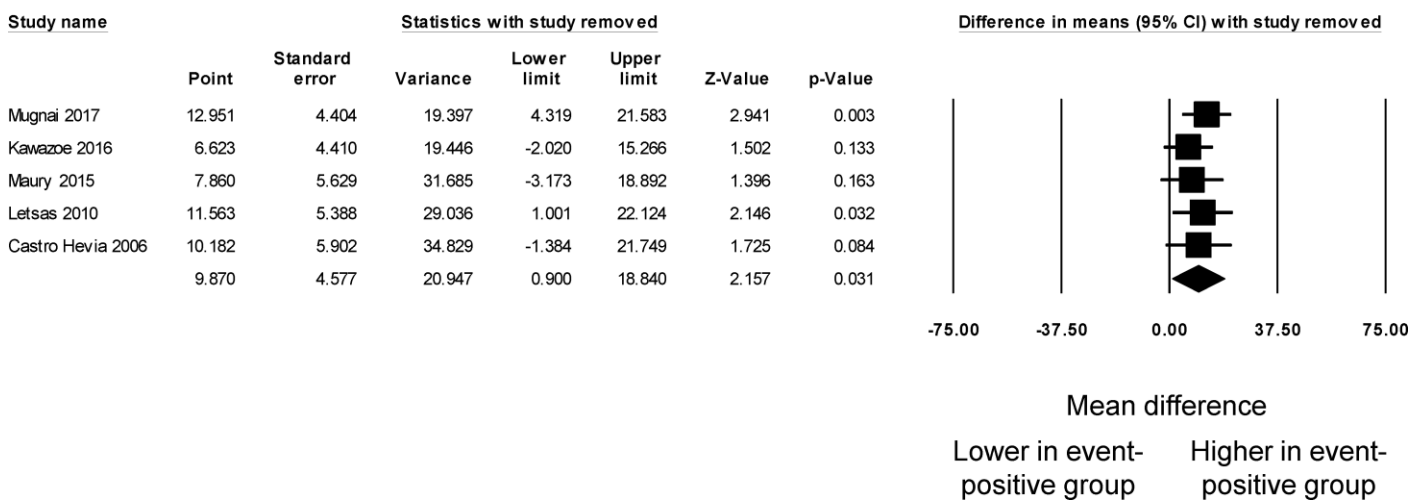

**Supplementary Figure 6.** Forest plot demonstrating the results of sensitivity analysis by removing one study at a time for mean differences for  $T_{\text{peak}} - T_{\text{end}}$  dispersion.

Mean difference in maximum  $T_{peak} - T_{end}$  between SCN5A and no SCN5A mutations

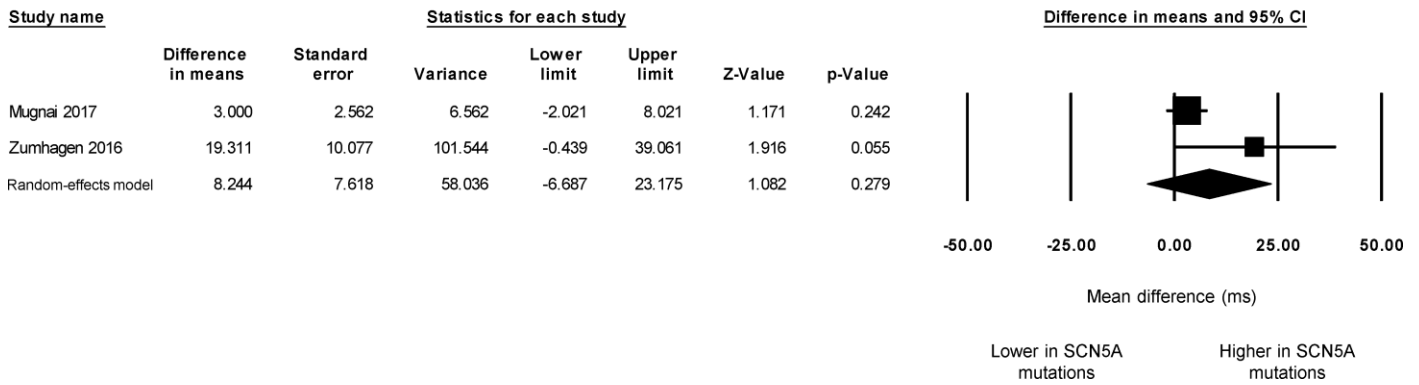

**Supplementary Figure 7.** Forest plot demonstrating the mean difference in  $T_{peak} - T_{end}$  intervals between patients with and without SCN5A mutations in Brugada Syndrome.

Mean difference in maximum  $T_{peak} - T_{end} / QT$  ratio between SCN5A and no SCN5A mutations

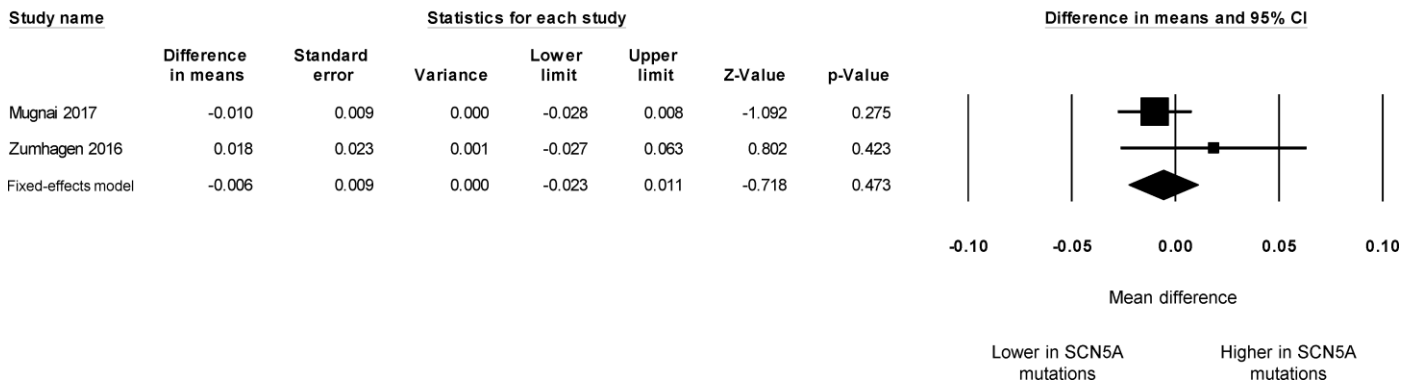

**Supplementary Figure 8.** Forest plot demonstrating the mean difference in  $T_{peak} - T_{end} / QT$  ratios between patients with and without SCN5A mutations in Brugada Syndrome.

Mean difference in  $T_{peak} - T_{end}$  dispersion between SCN5A and no SCN5A mutations

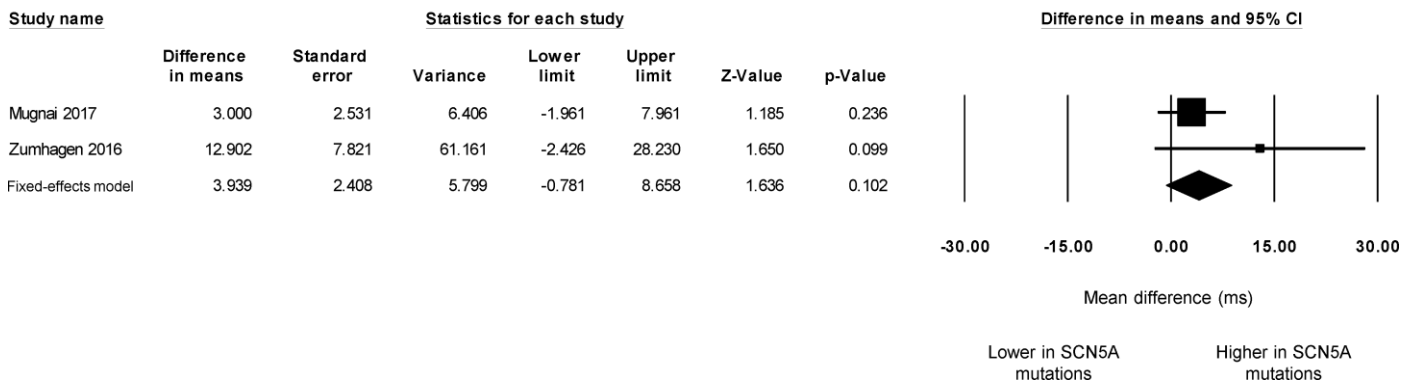

**Supplementary Figure 9.** Forest plot demonstrating the mean difference in  $T_{peak} - T_{end}$  dispersion between patients with and without SCN5A mutations in Brugada Syndrome.

**Supplementary Table 1.** NOS risk of bias scale for cohort studies.

| Studies     | Selection                        |                                             |                           |                                               |               | Outcome               |                                   |                                       | Total score (0-9) |
|-------------|----------------------------------|---------------------------------------------|---------------------------|-----------------------------------------------|---------------|-----------------------|-----------------------------------|---------------------------------------|-------------------|
|             | Representativeness of the Cohort | Selection of the exposed non-exposed cohort | Ascertainment of exposure | Outcome of interest present at start of study | Comparability | Assessment of outcome | Adequacy of duration of follow-up | Adequacy of completeness of follow-up |                   |
| Morita 2017 | 1                                | 0                                           | 1                         | 1                                             | 1 (age)       | 1                     | 1                                 | 1                                     | 7                 |
| Mugnai 2017 | 1                                | 0                                           | 1                         | 1                                             | 0             | 1                     | 1                                 | 1                                     | 6                 |
| Letsas 2010 | 1                                | 0                                           | 1                         | 1                                             | 0             | 1                     | 1                                 | 1                                     | 6                 |

**Supplementary Table 2.** NOS risk of bias scale for included case-control studies.

| Studies           | Selection                    |                             |                       |                        | Comparability | Exposure                  |                                           |                   | Total score (0-9) |
|-------------------|------------------------------|-----------------------------|-----------------------|------------------------|---------------|---------------------------|-------------------------------------------|-------------------|-------------------|
|                   | Adequate definition of cases | Representativeness of cases | Selection of controls | Definition of controls |               | Ascertainment of exposure | Same method of ascertainment for subjects | Non-response rate |                   |
| Zumhagen 2016     | 1                            | 1                           | 0                     | 0                      | 1 (age)       | 1                         | 1                                         | 1                 | 6                 |
| Maury 2015        | 1                            | 1                           | 0                     | 1                      | 1 (age)       | 1                         | 1                                         | 1                 | 7                 |
| Junttila 2008     | 1                            | 1                           | 0                     | 1                      | 1 (age)       | 1                         | 1                                         | 1                 | 7                 |
| Wang 2007         | 1                            | 1                           | 1                     | 1                      | 1 (age)       | 1                         | 1                                         | 1                 | 8                 |
| Castro Hevia 2006 | 1                            | 1                           | 1                     | 1                      | 1 (age)       | 1                         | 1                                         | 1                 | 8                 |
| Kawazoe 2016      | 1                            | 1                           | 0                     | 1                      | 1 (age)       | 1                         | 1                                         | 1                 | 7                 |
